# Supplementary material for: Insight into piezoelectricity modulation mechanism of ZnO doped with Y ions
Source: Royal Society of Chemistry journal article supplement (doi:10.1039/d4ta01317d), 2024-01-01
Supplement: d4ta01317d1.pdf [file d4ta01317d1.pdf]

## **Insight into piezoelectricity modulation mechanism of ZnO doped with Y ions**

*Zihan Wang<sup>1</sup>, Yue Sun<sup>1</sup>, Shenglong Wang<sup>1</sup>, Da Xiong<sup>1</sup>, Guo Tian<sup>1</sup>, Longchao Huang<sup>1</sup>,  
Boling Lan<sup>1</sup>, Long Jin<sup>1</sup>, Weiqing Yang<sup>1,2</sup>, Weili Deng<sup>1</sup>, \**

<sup>1</sup>Key Laboratory of Advanced Technologies of Materials (Ministry of Education),  
School of Materials Science and Engineering, Southwest Jiaotong University, Chengdu  
610031, P. R. China

<sup>2</sup>Research Institute of Frontier Science, Southwest Jiaotong University, Chengdu  
610031, P. R. China

\*E-mail: [weili1812@swjtu.edu.cn](mailto:weili1812@swjtu.edu.cn)

This file includes:

**Figure S1.** Fabrication schematic diagram of ZnO NRs film devices.

**Figure S2.** Surface SEM images of ZnO NRs with different doping concentrations.

**Figure S3.** Cross-sectional SEM images of ZnO NRs with different doping concentrations.

**Figure S4.** Length and diameter statistics of ZnO NRs with different doping concentrations.

**Figure S5.** Schematic diagram of the Mott-Schottky test method by three electrodes.

**Figure S6.** Mott-Schottky plots of ZnO with different doping concentrations.

**Figure S7.** Schematic diagram of a piezoelectric device based on ZnO NRs.

**Figure S8.** Trend diagram of ZnO (green) and Y- ZnO (blue) under forces ranging from 1 to 9 N.

**Figure S9.** Current output of Y-ZnO with different doping concentrations under the forces ranging from 1 to 9 N.

**Figure S10.** Voltage output of Y-ZnO with different doping concentrations under the forces ranging from 1 to 9 N.

**Figure S11.** Piezoelectric outputs with error bars and confidence bands of ZnO with different doping concentrations under the force of 5 N.

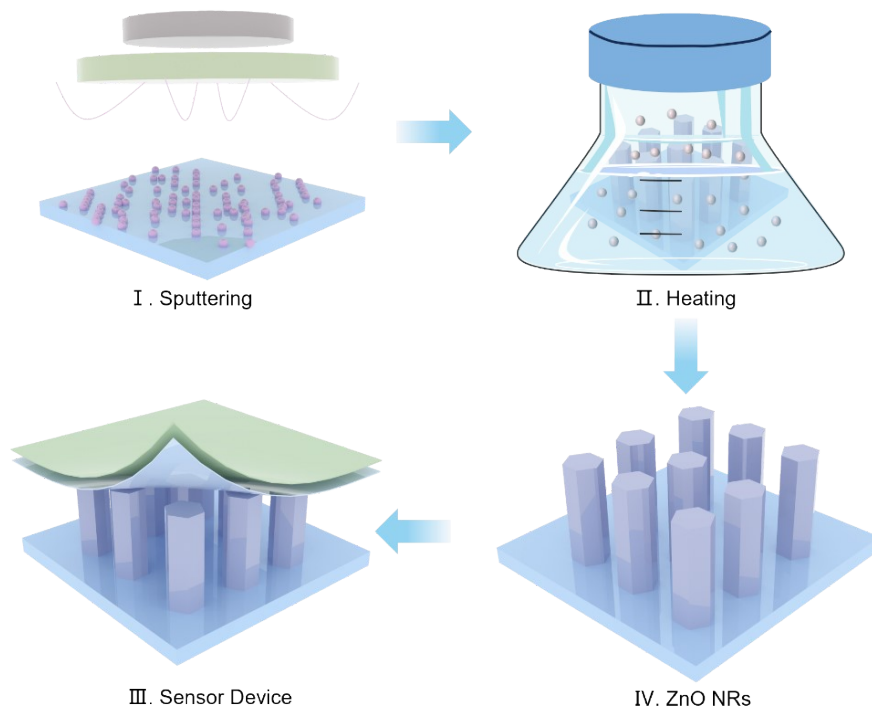

**Figure S1.** Fabrication schematic diagram of ZnO NRs film devices.

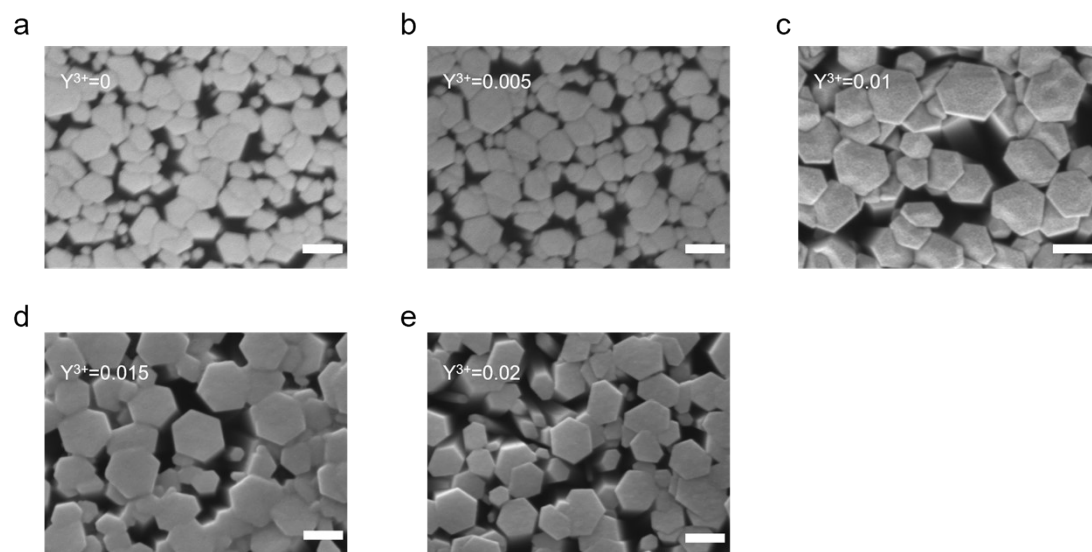

**Figure S2.** Surface SEM images of ZnO NRs with different doping concentrations. Scale bars, 300 nm.

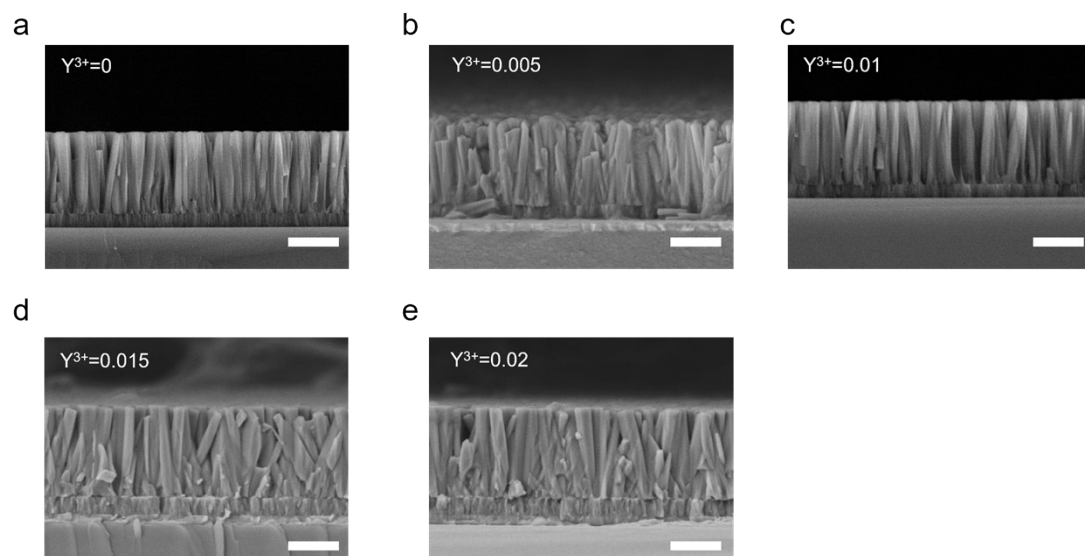

**Figure S3.** Cross-sectional SEM images of ZnO NRs with different doping concentrations. Scar bars, 1  $\mu\text{m}$ .

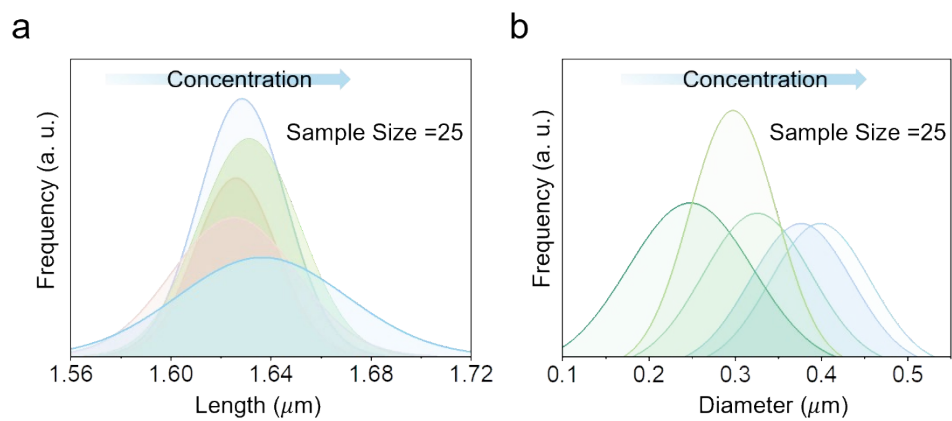

**Figure S4.** Length and diameter statistics of ZnO NRs with different doping concentrations.

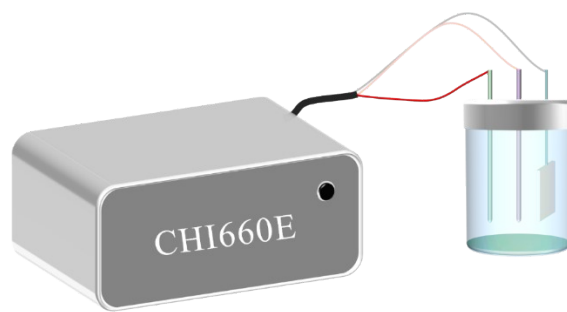

**Figure S5.** Schematic diagram of the Mott-Schottky test method by three electrodes.

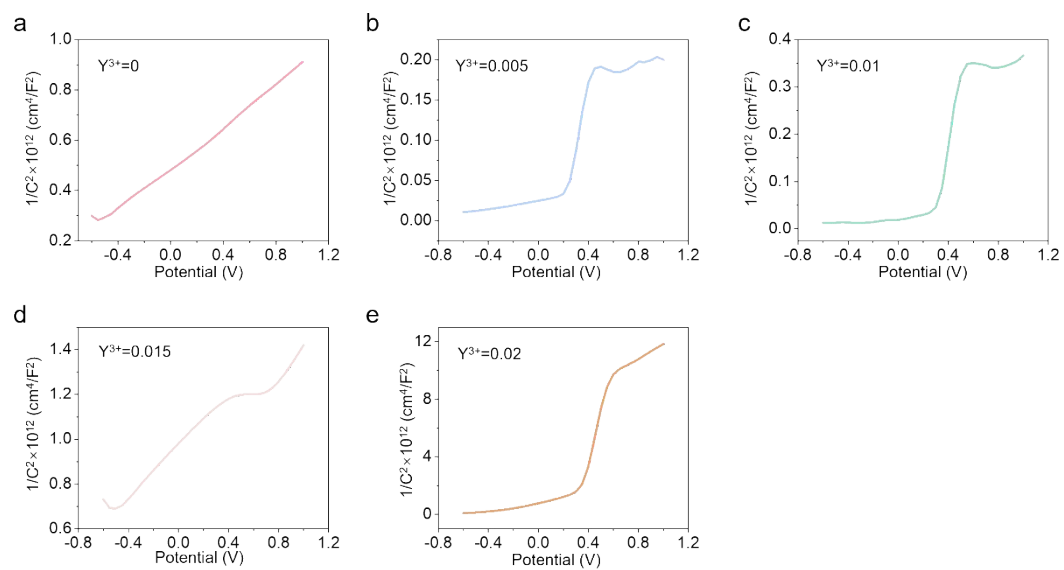

**Figure S6.** Mott-Schottky plots of ZnO with different doping concentrations.



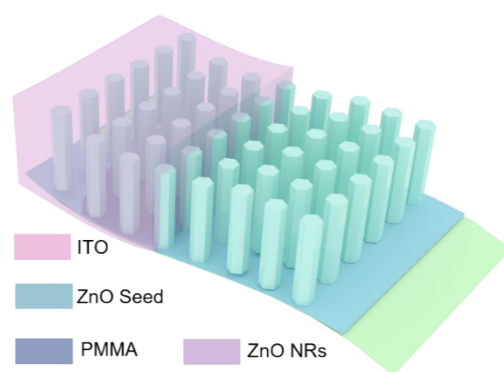

**Figure S7.** Schematic diagram of a piezoelectric device based on ZnO NRs.

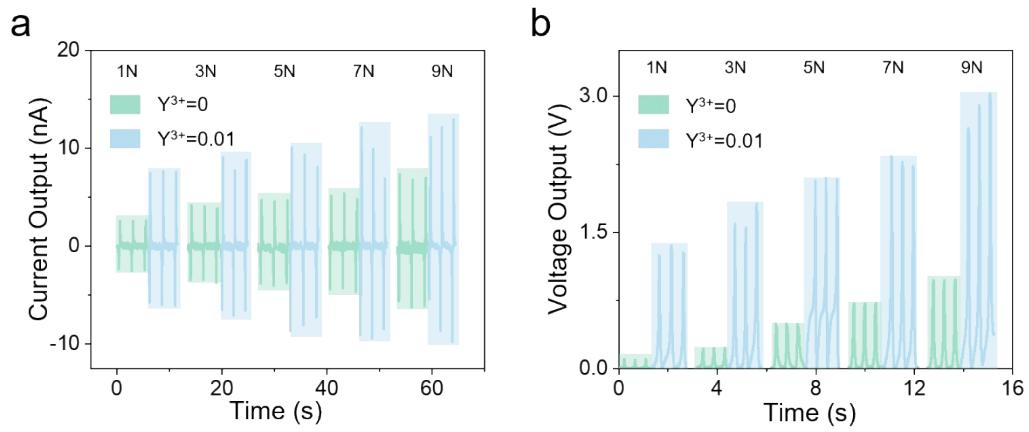

**Figure S8.** Trend diagram of ZnO (green) and Y- ZnO (blue) under forces ranging from 1 to 9 N. Force area, 9 cm<sup>2</sup>.

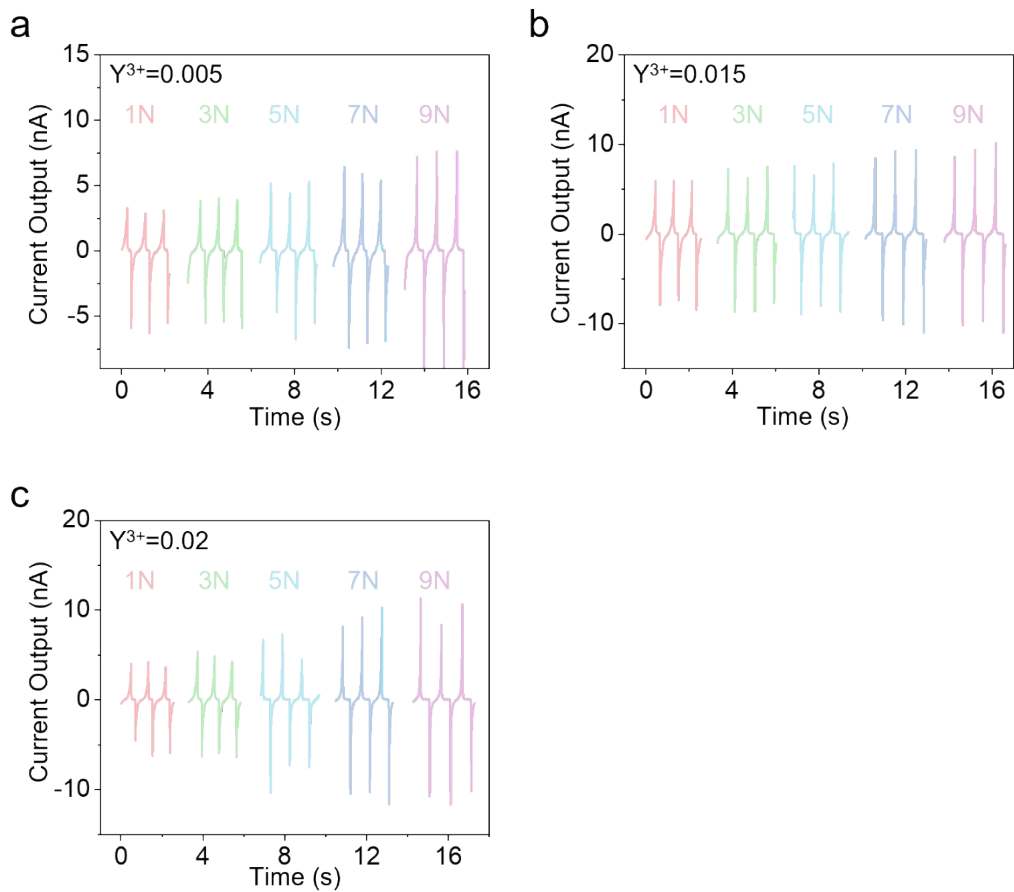

**Figure S9.** Current output of Y-ZnO with different doping concentrations under the forces ranging from 1 to 9 N. Force area, 9 cm<sup>2</sup>.

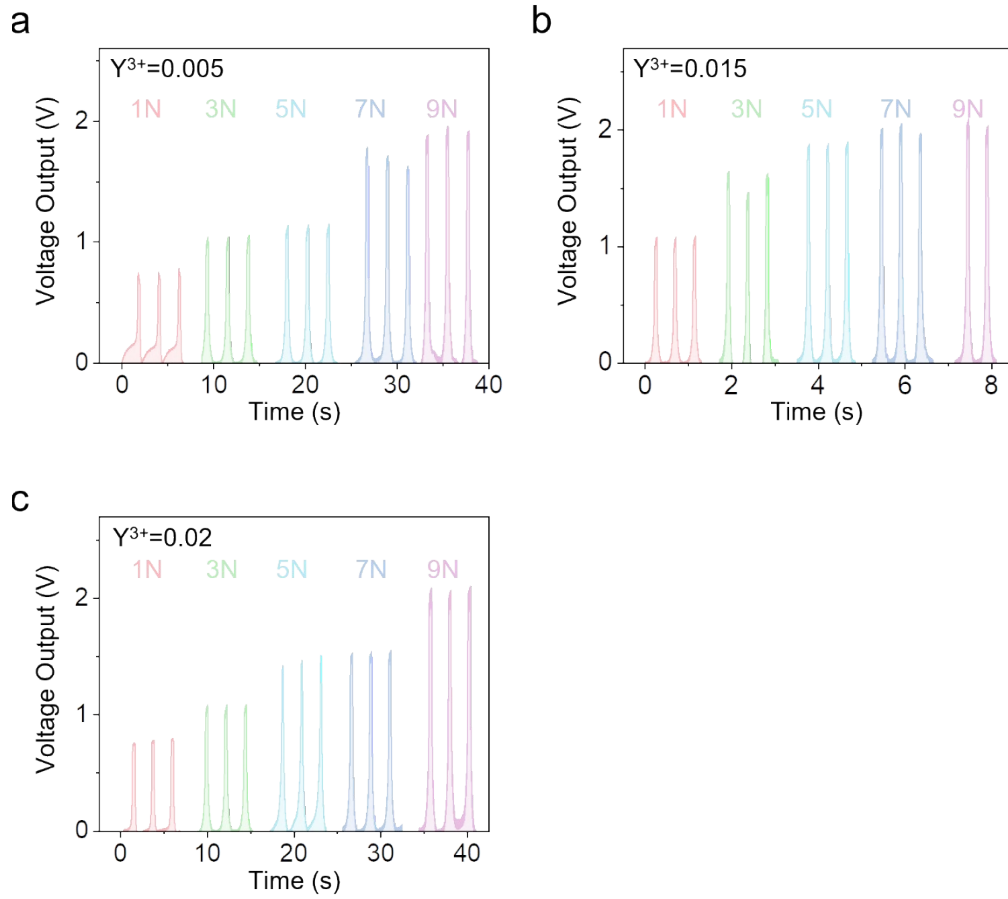

**Figure S10.** Voltage output of Y-ZnO with different doping concentrations under the forces ranging from 1 to 9 N. Force area, 9 cm<sup>2</sup>.

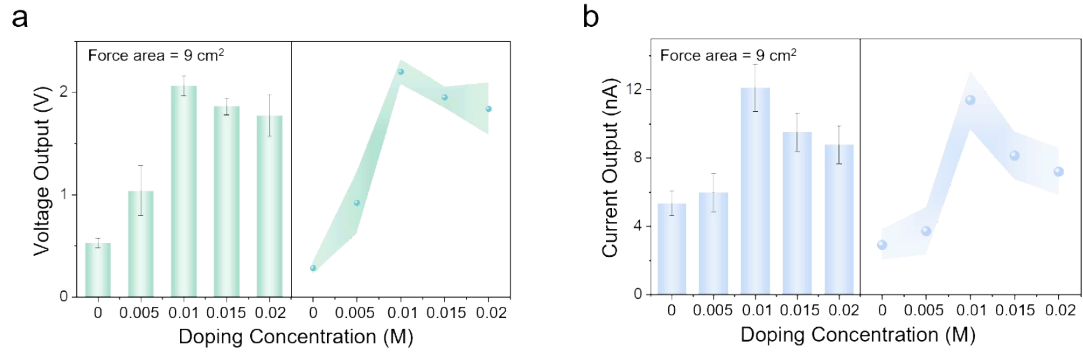

**Figure S11.** Piezoelectric outputs with error bars and confidence bands of ZnO with different doping concentrations under the force of 5 N. Force area, 9 cm<sup>2</sup>.
